# Supplementary figures and images for: A randomized 3x3 crossover study to evaluate the effect of Hass avocado intake on post-ingestive satiety, glucose and insulin levels, and subsequent energy intake in overweight adults
Source: Springer Nature journal article supplement (doi:10.1186/1475-2891-12-155), 2013-11-27

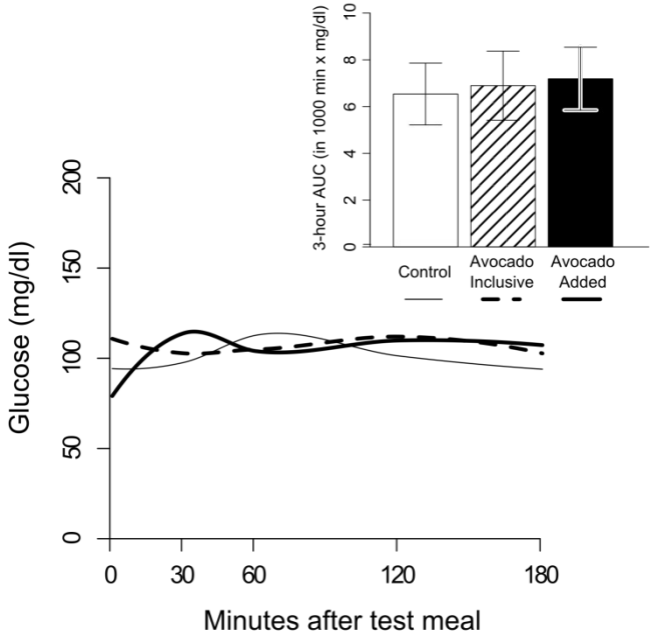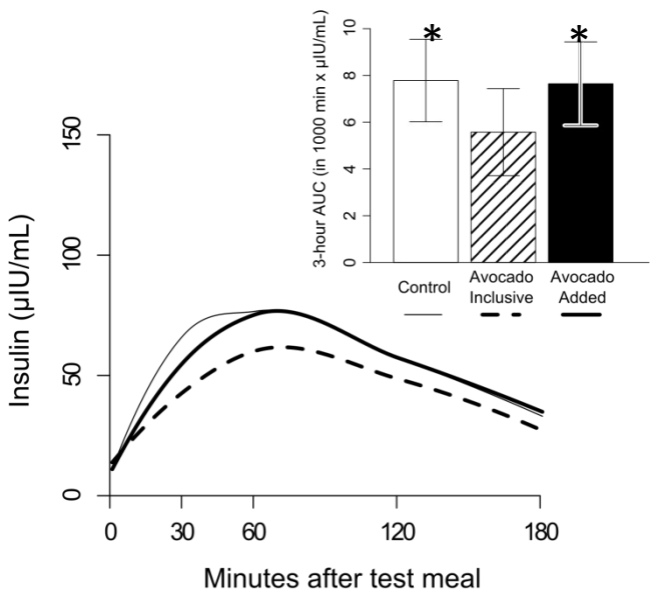

Supplement: 12937_2013_732_MOESM1_ESM.pdf [file 12937_2013_732_MOESM1_ESM.pdf]

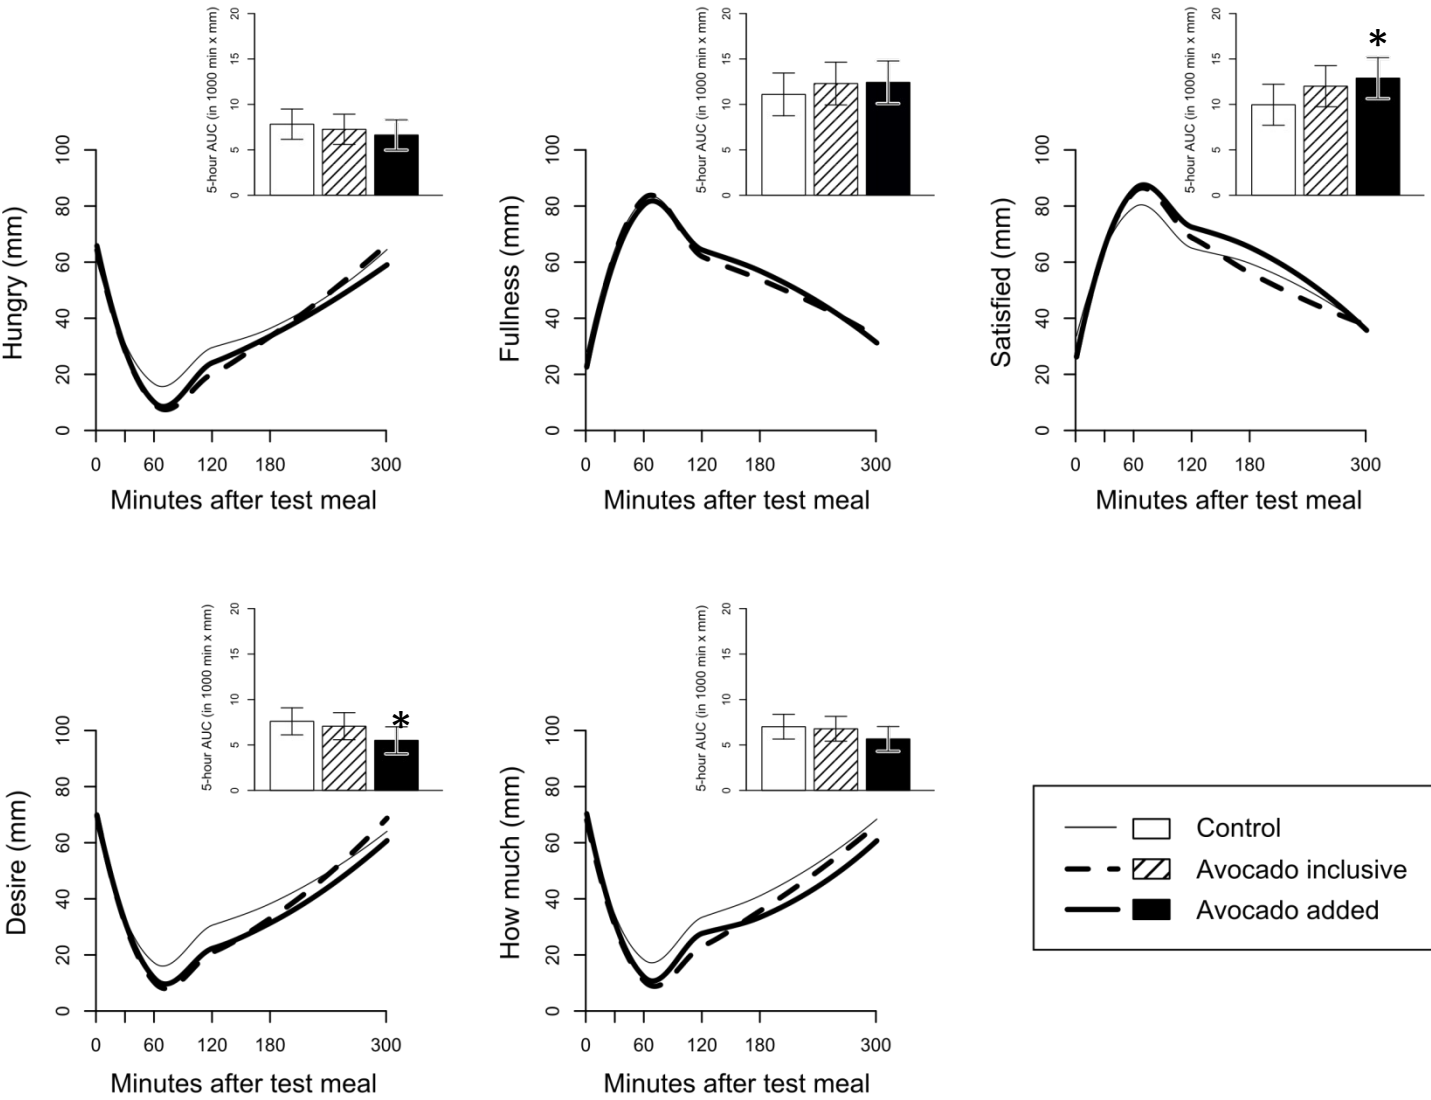

Supplement: 12937_2013_732_MOESM2_ESM.pdf [file 12937_2013_732_MOESM2_ESM.pdf]
